# Supplementary material for: Ticks and Chlamydia-Related Bacteria in Swiss Zoological Gardens Compared to in Contiguous and Distant Control Areas
Source: MDPI journal article supplement (doi:10.3390/microorganisms11102468), 2023-09-30

**Figure S2: Pictures from some of the flagging sessions.** Enclosure of Bears, Alpacas, Wolves, Snow Leopards, Goats - Vultures, and Badger are specified with icons. Surrounding enclosure of Parrots, Buffalos, Reindeers, Deers and Wild Pigs are specified with icons. A tick icon next to a picture indicates that at least 1 tick has been collected during the flagging session in which the picture has been taken.

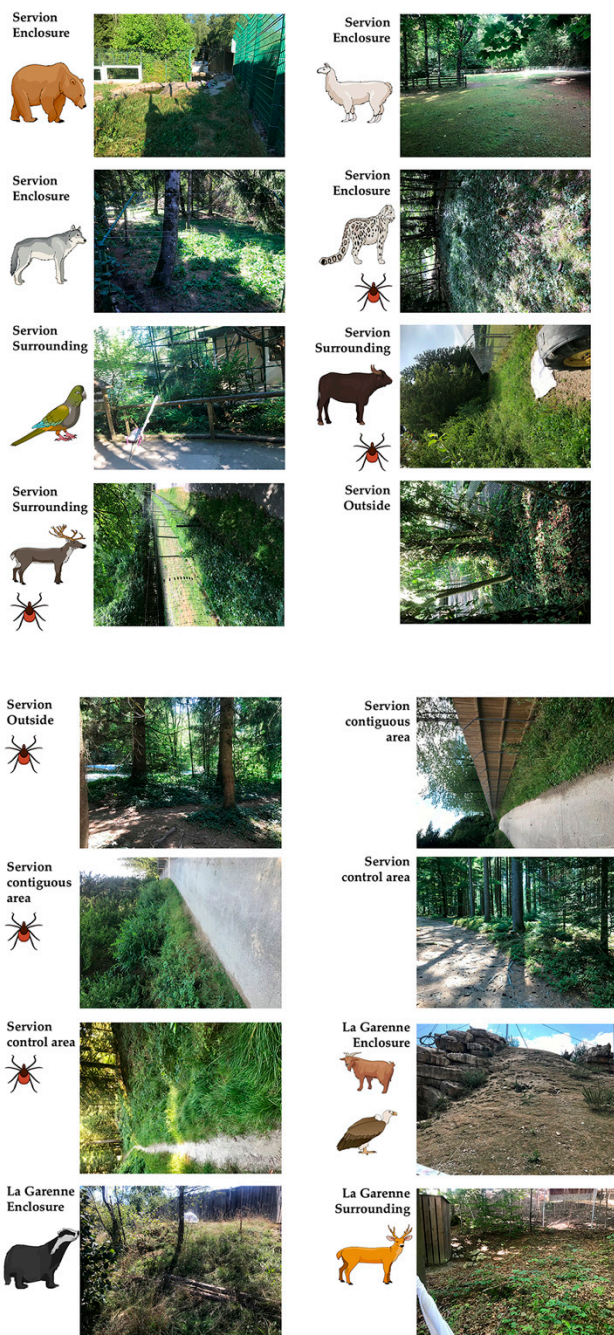

La Garenne  
Surrounding

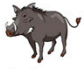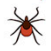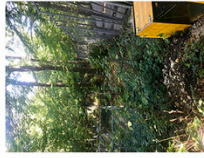

La Garenne  
Outside

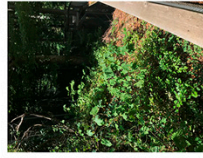

La Garenne  
contiguous area

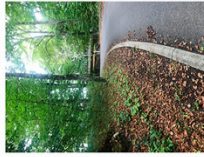

La Garenne  
contiguous area

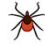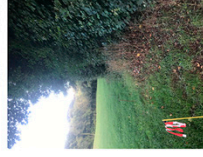

La Garenne  
control area

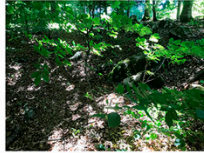

La Garenne  
control area

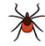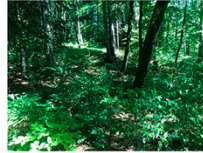

La Garenne  
Surrounding

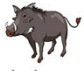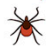

La Garenne  
contiguous area



La Garenne  
control area



La Garenne  
Outside



La Garenne  
contiguous area



La Garenne  
control area



Supplement: s1 [file s1]
