# Supplementary material for: Ticks and Chlamydia-Related Bacteria in Swiss Zoological Gardens Compared to in Contiguous and Distant Control Areas
Source: MDPI journal article supplement (doi:10.3390/microorganisms11102468), 2023-09-30
Supplement: s1 [file s1]

**Table S5: Results of the basic local alignment search Tool (BLAST) analysis from the 16S rRNA gene sequences of the positive samples for pan-*Chlamydiae* TaqMan quantitative PCR (pC-qPCR).** Percentage of similarity with specific species of *Chlamydiae* is shown in the third column. The 16S rRNA sequencing only allows identification to the Family-level lineage (second column). Note in the third column the accession numbers referring to specific species of *Chlamydiae*, and the Mean DNA/μl in the fifth column.

| Sample <sup>o</sup> | Family-level lineage <sup>oo</sup> | Similarity (%) | Accession number (species) | Mean DNA/μl |
|---------------------|------------------------------------|----------------|----------------------------|-------------|
| 2.9.6_1             | <i>Parachlamydiaceae</i>           | 99             | NR_025037                  | 2,215       |
| 2.9.6_2             | ND                                 |                |                            |             |
| 3.2.5_1             | <i>Parachlamydiaceae</i>           | 97             | NR_025037                  | 1,869       |
| 3.2.5_2             | <i>Parachlamydiaceae</i>           | 98             | JN051144                   | 1,869       |
| 3.3.2_1             | <i>Parachlamydiaceae</i>           | 98             | NR_025037                  | 1,462       |
| 3.3.2_2             | <i>Parachlamydiaceae</i>           | 99             | JN051144                   | 1,462       |
| 3.8.4_1             | <i>Parachlamydiaceae</i>           | 98.5           | NR_115817                  | 2,143       |
| 3.8.4_2             | <i>Parachlamydiaceae</i>           | 99             | JN051144                   | 2,143       |
| 5.1.1_1             | <i>Parachlamydiaceae</i>           | 99             | JN051144                   | 2,632       |
| 5.1.1_2             | <i>Simkaniaceae</i>                | 97             | NR_074932                  | 2,632       |
| 5.1.1_3             | <i>Parachlamydiaceae</i>           | 100            | not available              | -           |
| 5.1.1_4             | <i>Parachlamydiaceae</i>           | 96             | not available              | -           |
| 5.1.1_5             | <i>Parachlamydiaceae</i>           | 98             | not available              | -           |
| 7.1.5               | <i>Parachlamydiaceae</i>           | 98             | NR_115817                  | 0.217       |
| 7.3.1_1             | <i>Rhabdochlamydiaceae</i>         | 99             | KF720713                   | 75,205      |
| 7.3.1_2             | <i>Rhabdochlamydiaceae</i>         | 99             | KF720713                   | 75,205      |
| 7.4.2               | <i>Parachlamydiaceae</i>           | 96             | JN051144                   | 0,400       |
| 7.6.3_1             | <i>Parachlamydiaceae</i>           | 99             | JN051144                   | 0,667       |
| 7.6.3_2             | ND                                 |                |                            | 0,667       |
| 7.7.1_1             | <i>Simkaniaceae</i>                | 96             | NR_074932                  | 1,580       |
| 7.7.1_2             | <i>Simkaniaceae</i>                | 96             | NR_074932                  | 1,580       |

|          |                            |    |           |          |
|----------|----------------------------|----|-----------|----------|
| 8.4.2    | <i>Parachlamydiaceae</i>   | 99 | NR_115817 | 0,326    |
| 8.4.3    | ND                         |    |           | 0,257    |
| 8.6.2    | <i>Parachlamydiaceae</i>   | 98 | NR_026357 | 0,354    |
| 10.6.3_1 | <i>Rhabdochlamydiaceae</i> | 99 | KF720713  | 6471,756 |
| 10.6.3_2 | <i>Rhabdochlamydiaceae</i> | 99 | KF720713  | 6471,756 |
| 10.6.4   | ND                         |    |           | 0,431    |
| 11.3.4   | <i>Parachlamydiaceae</i>   | 97 | NR_025037 | 0,698    |
| 12.2.1   | <i>Parachlamydiaceae</i>   | 98 | NR_115817 | 0,671    |
| 12.5.5_1 | <i>Parachlamydiaceae</i>   | 99 | JN051144  | 2,015    |
| 12.5.5_2 | <i>Parachlamydiaceae</i>   | 98 | JN051144  | 2,015    |
| 12.5.9   | ND                         |    |           | 0,670    |
| 12.6.1   | <i>Parachlamydiaceae</i>   | 98 | AF083614  | 1,027    |
| 12.6.3   | <i>Parachlamydiaceae</i>   | 97 | JN051144  | 0,631    |
| 13.2.1   | <i>Parachlamydiaceae</i>   | 98 | JN112799  | 1,892    |

° The first number indicates the day of the sessions, the second indicates the session of that day, the third the number of the tick, and the 4<sup>th</sup> number which duplicate it is. For example, the tick called 2.9.6\_1 was collected during the second day of flagging, it was the 9<sup>th</sup> session of that day, and was the 6<sup>th</sup> tick of that session, 1<sup>st</sup> of the duplicate.

°° ND = not determinated.
