# Supplementary material for: Ticks and Chlamydia-Related Bacteria in Swiss Zoological Gardens Compared to in Contiguous and Distant Control Areas
Source: MDPI journal article supplement (doi:10.3390/microorganisms11102468), 2023-09-30

Figure S4: Mean 16S rRNA gene copy number /  $\mu\text{l}$  according to the family of *Chlamydiae*. Please note the high mean 16S rRNA gene copy number /  $\mu\text{l}$  of *Rhabdochlamydiaceae*.

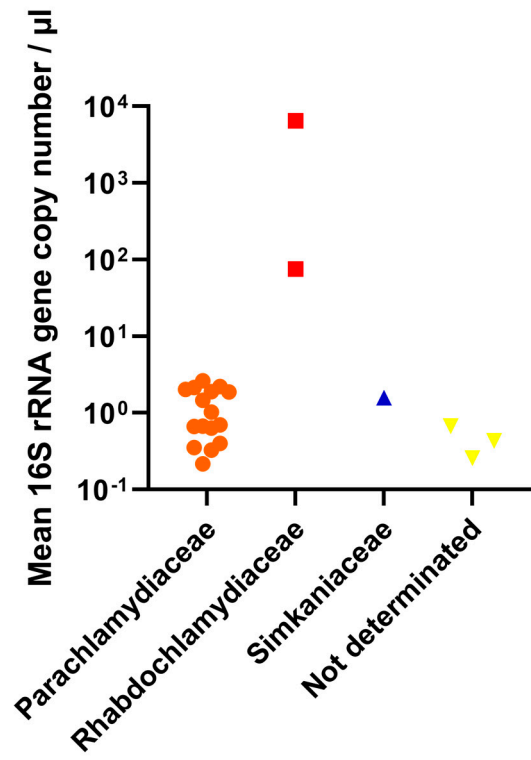

Supplement: s1 [file s1]
