# Supplementary material for: Ticks and Chlamydia-Related Bacteria in Swiss Zoological Gardens Compared to in Contiguous and Distant Control Areas
Source: MDPI journal article supplement (doi:10.3390/microorganisms11102468), 2023-09-30
Supplement: s1 [file s1]

**Figure S1: Weather according to the date of sampling.** The red curve indicates the mean temperature. The bar plots indicate the rain. Wind speed and direction is represented with arrows. Under each picture is written the date. Next to each picture, you can see the corresponding samples. Above the red line of each picture is written the corresponding place: Forel and Mollie-Margot represent Servion region, le Vaud represent La Garenne region. Pictures were obtained using the Swiss weather mobile application.

20.07.22  
Samples 1.1 to 1.8

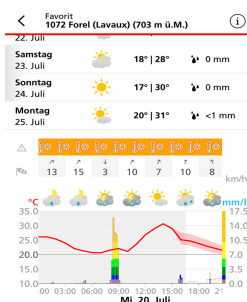

25.07.22  
Samples 2.1 to 2.14

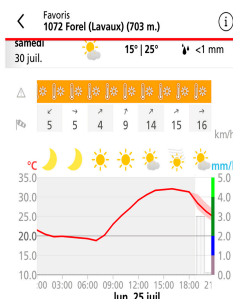

26.07.22  
Samples 3.1 to 3.8

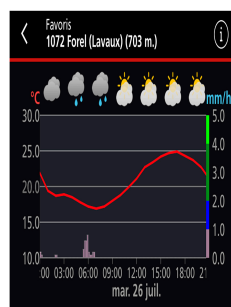

27.07.22  
Samples 4.1 to 4.9

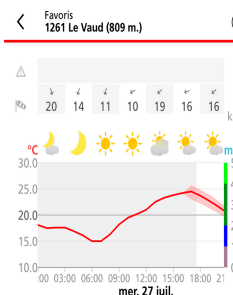

28.07.22  
Samples 5.1 to 5.6

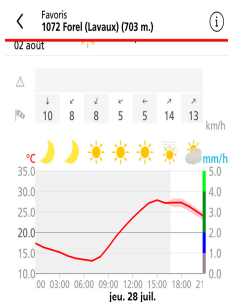

03.08.22  
Samples 6.1 to 6.7

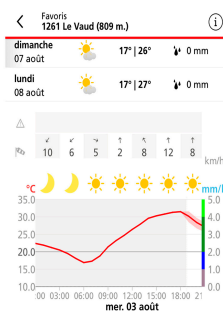

04.08.22  
Samples 7.1 to 7.11

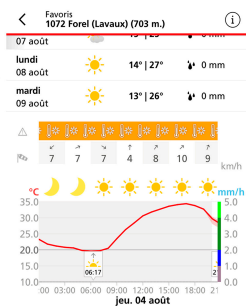

08.08.22  
Samples 8.1 to 8.8

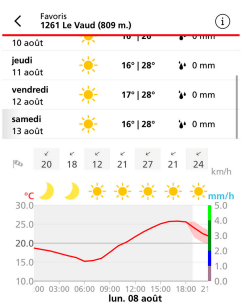

09.08.22  
Samples 9.1 to 9.6

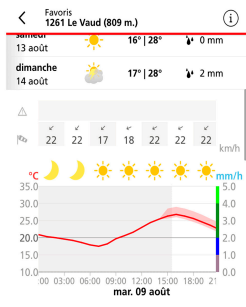

10.08.22  
Samples 10.1 to 10.8

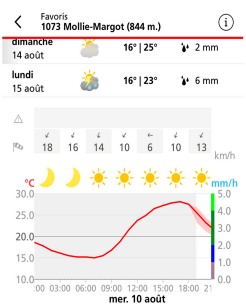

11.08.22  
Samples 11.1 to 11.3

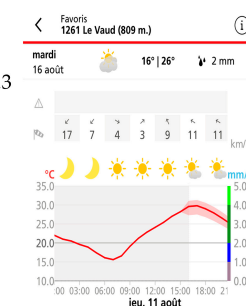

11.08.22  
Samples 11.4 to 11.7

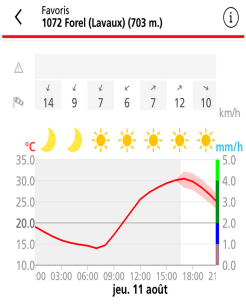

**Favorit**  
**1072 Forel (Lavaux) (703 m.)**

samedi  
 20 août

☀️ 14° | 23° 🌧️ 2 mm

| Hour | Temp (°C) | Icon | Precip (mm) |
|------|-----------|------|-------------|
| 09   | ~15       | ☁️   | 0           |
| 10   | ~16       | ☁️   | 0           |
| 15   | ~18       | ☀️   | 0           |
| 16   | ~19       | ☀️   | 0           |
| 17   | ~20       | ☀️   | 0           |
| 18   | ~21       | ☀️   | 0           |
| 19   | ~22       | ☀️   | 0           |
| 20   | ~21       | ☀️   | 0           |
| 21   | ~20       | ☀️   | 0           |

**Favorit**  
**1261 Le Vaud (809 m.)**

12 sept. 14° | 24° 0 mm

mardi  
13 sept.

11 8 7 5 18 18 15 km/h

°C mm/h

25.0  
20.0  
15.0  
10.0  
5.0

00 03:00 06:00 09:00 12:00 15:00 18:00 21

jeu. 08 sept.

**Favoris**  
1261 Le Vaud (809 m.)

**mercredi**  
14 sept.

16° | 24°  
3 mm

11 16 5 13 17 16 17

30.0  
25.0  
20.0  
15.0  
10.0  
5.0

00 03 06 09 12 15 18 21

ven. 09 sept.

**Favours**  
1261 Le Vaud (809 m.)

15 sept.  
vendredi  
16 sept.

11° | 19°  
3 mm

7 5 8 5 9 12 km/h

30.0  
20.0  
10.0  
5.0

00 03:00 06:00 09:00 12:00 15:00 18:00 21:00

07:57 19:54

dim. 11 sept.

**Favos**  
1261 Le Vaud (809 m.)

17 sept. 13°  
18 sept. 6° 13° <1 mm

**Alertes d'intempéries**

| 17   | 18 | 19 | 20 | 21 | 22 | 23 | 24 |
|------|----|----|----|----|----|----|----|
| 6    | 7  | 6  | 4  | 5  | 9  | 12 |    |
| mm/h |    |    |    |    |    |    |    |

**mar. 13 sept.**

00 03 06 09 12 15 18 21

25.0°C  
20.0°C  
15.0°C  
10.0°C  
5.0°C

07:10 19:00

5.0 mm/h  
3.0 mm/h  
1.0 mm/h  
0.0 mm/h
