# Supplementary material for: Ticks and Chlamydia-Related Bacteria in Swiss Zoological Gardens Compared to in Contiguous and Distant Control Areas
Source: MDPI journal article supplement (doi:10.3390/microorganisms11102468), 2023-09-30

**Figure S3: Flag of 1m<sup>2</sup> used for the flagging sessions.** Please note the white cotton shirt, and the handle made of bamboo.

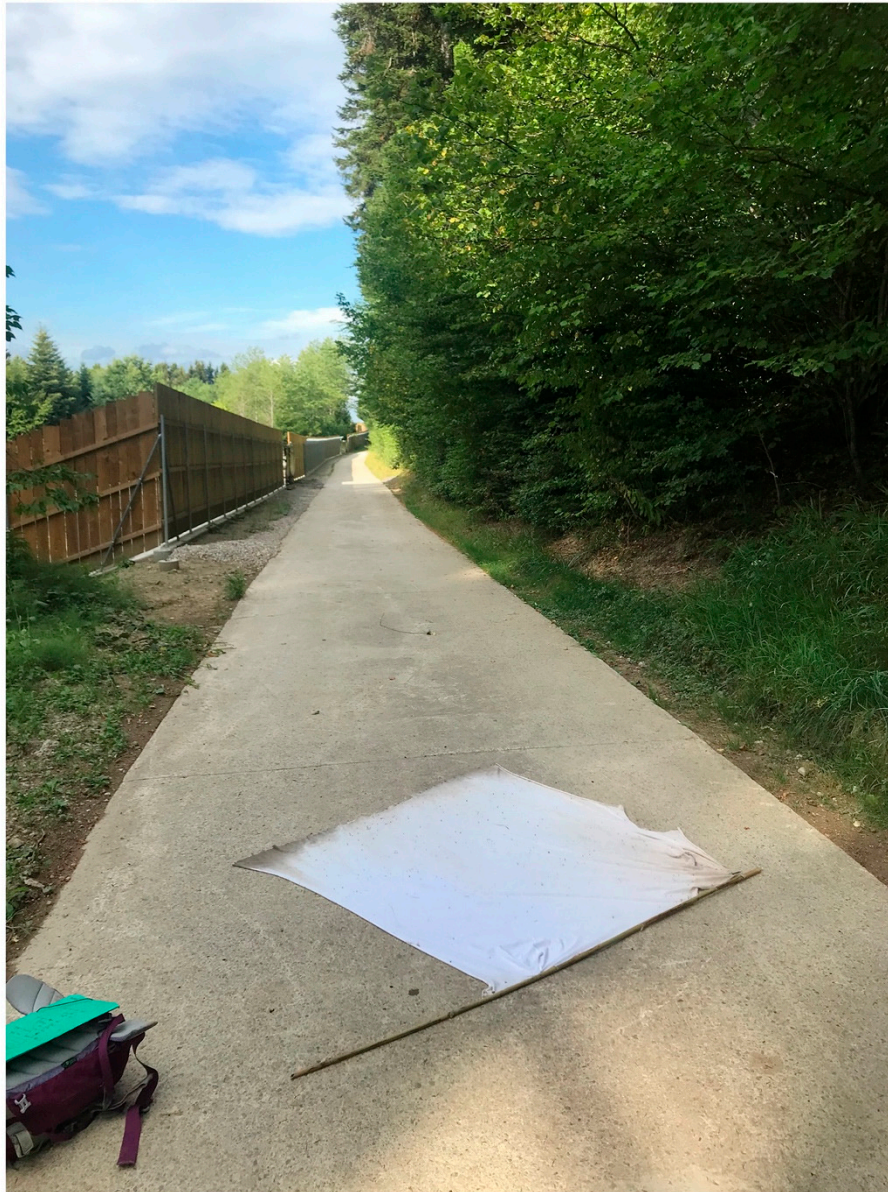

Supplement: s1 [file s1]
