# Supplementary material for: Ticks and Chlamydia-Related Bacteria in Swiss Zoological Gardens Compared to in Contiguous and Distant Control Areas
Source: MDPI journal article supplement (doi:10.3390/microorganisms11102468), 2023-09-30
Supplement: s1 [file s1]

**Table S2 : Total flagging time and Mean Flagging time of the different flagging areas.** Mean flagging time for a place is obtained by dividing the total flagging time of that place with the number of sessions of that place, each session ranging from 2 to 10 minutes of flagging.

| <b>Place</b>      | <b>Total flagging time (min)</b> | <b>Mean Flagging time (min)</b> |
|-------------------|----------------------------------|---------------------------------|
| <b>La Garenne</b> |                                  |                                 |
| Zoo               | 194                              | 9.4                             |
| -Enclosure        | 52                               | 8.6                             |
| -Surrounding      | 70                               | 10                              |
| -Outside          | 72                               | 9                               |
| Contiguous area   | 260                              | 9.6                             |
| Control area      | 84                               | 9.3                             |
| <b>Servion</b>    |                                  |                                 |
| Zoo               | 198                              | 8.4                             |
| -Enclosure        | 78                               | 6                               |
| -Surrounding      | 40                               | 8                               |
| -Outside          | 80                               | 7.2                             |
| Contiguous area   | 218                              | 9.4                             |
| Control area      | 130                              | 10                              |
