# Supplementary material for: Ticks and Chlamydia-Related Bacteria in Swiss Zoological Gardens Compared to in Contiguous and Distant Control Areas
Source: MDPI journal article supplement (doi:10.3390/microorganisms11102468), 2023-09-30
Supplement: s1 [file s1]

**Table S3: Mean ticks/min and Median ticks/min of different flagging areas.** Mean ticks/min for a place represent the total of ticks/min of that place divided by the total amount of sessions at that place. Please note that combination of different places are represented in this table (for example Surrounding, Outside and contiguous area together).

| Place                                                          | Mean (ticks/min) | Median (ticks/min) |
|----------------------------------------------------------------|------------------|--------------------|
| La Garenne and Servion                                         |                  |                    |
| Enclosure                                                      | 0                | 0                  |
| Surrounding, Outside                                           | 0.048            | 0                  |
| Surrounding, Outside, Contiguous area                          | 0.112            | 0                  |
| Surrounding, Outside, Contiguous area, Control area            | 0.189            | 0                  |
| Contiguous area                                                | 0.152            | 0.1                |
| Contiguous area, Control area                                  | 0.25             | 0.1                |
| La Garenne                                                     |                  |                    |
| Enclosure, Outside, Surrounding, Contiguous area               | 0.039            | 0                  |
| Enclosure, Outside, Surrounding, Contiguous area, Control area | 0.121            | 0                  |
| Servion                                                        |                  |                    |
| Enclosure, Outside, Surrounding, Contiguous area               | 0.137            | 0                  |
| Enclosure, Outside, Surrounding, Contiguous area, Control area | 0.193            | 0                  |
