# Supplementary material for: Ticks and Chlamydia-Related Bacteria in Swiss Zoological Gardens Compared to in Contiguous and Distant Control Areas
Source: Microorganisms. 2023 Sep 30;11(10):2468. doi: 10.3390/microorganisms11102468 (PMC10609390; doi:10.3390/microorganisms11102468)
Supplement: Supplementary file 1 [file microorganisms-11-02468-s001.zip › Table S1.xlsx]

## Sheet: Feuil1
Table S1: Detailed sampling plan. This table was used to calculate the ticks/min value: there are 122 sessions and 122 ticks/min values. A ticks/min value for a session is obtained by dividing the number of ticks collected during that session, divided by the total flagging time of that session. Please note that for each flagging session, stage and total number of ticks is provided.
Sample°	Date	Time (min)	Place°°	Precision°°°	Larva	Nymph	Male	Female	Total
1_1	2022-07-20	10	SE	Poney					0
1_2	2022-07-20	10	SO						0
1_3	2022-07-20	4	SO						0
1_4	2022-07-20	10	SO						0
1_5	2022-07-20	10	SU	Reindeer		1			1
1_6	2022-07-20	10	SCA			1			1
1_7	2022-07-20	10	SCA				1	2	3
1_8	2022-07-20	8	SE	Reindeer					0
2_1	2022-07-25	14	SE	Bear					0
2_2	2022-07-25	10	SE	Alpaca					0
2_3	2022-07-25	4	SO						0
2_4	2022-07-25	4	SO						0
2_5	2022-07-25	4	SU	Parrot					0
2_6	2022-07-25	8	SE	Wolf					0
2_7	2022-07-25	10	SO	Buffalo					0
2_8	2022-07-25	10	SCA					1	1
2_9	2022-07-25	10	SCA		1	5	2		8
2_10	2022-07-25	10	SU	Reindeer					0
2_11	2022-07-25	10	SO						0
2_12	2022-07-25	4	SE	Tamarin Monkey					0
2_13	2022-07-25	10	SE	lemur Monkey					0
2_14	2022-07-25	10	SU	Buffalo				1	1
3_1	2022-07-26	2	SE	Wolf					0
3_2	2022-07-26	10	SCA			4	1		5
3_3	2022-07-26	10	SCA			1	2		3
3_4	2022-07-26	6	SU	Reindeer		1			1
3_5	2022-07-26	10	SCA						0
3_6	2022-07-26	6	SCA						0
3_7	2022-07-26	10	SCA						0
3_8	2022-07-26	10	SCA				3	2	5
4_1	2022-07-27	10	GO						0
4_2	2022-07-27	2	GE	European Eagle Owl					0
4_3	2022-07-27	10	GE	Vulture, Ibex					0
4_4	2022-07-27	10	GE	Bearded Vulture					0
4_5	2022-07-27	2	GO						0
4_6	2022-07-27	10	GO						0
4_7	2022-07-27	10	GCA						0
4_8	2022-07-27	10	GCA						0
4_9	2022-07-27	10	GC			4	1		5
5_1	2022-07-28	2	SO			1			1
5_2	2022-07-28	4	SE	Snow Leopard	14				14
5_3	2022-07-28	2	SE	Lion					0
5_4	2022-07-28	2	SE	Tiger					0
5_5	2022-07-28	2	SE	Bear					0
5_6	2022-07-28	6	SO		1	0			1
6_1	2022-08-03	10	GCA			3			3
6_2	2022-08-03	10	GCA			1			1
6_3	2022-08-03	8	GCA						0
6_4	2022-08-03	6	GCA						0
6_5	2022-08-03	10	GCA			3			3
6_6	2022-08-03	6	GCA						0
6_7	2022-08-03	10	GCA			3			3
7_1	2022-08-04	10	SCA			4		2	6
7_2	2022-08-04	10	SCA			1			1
7_3	2022-08-04	10	SCA				1		1
7_4	2022-08-04	10	SCA			2		2	4
7_5	2022-08-04	2	SE	Snow leopard					0
7_6	2022-08-04	10	SO			2	1		3
7_7	2022-08-04	10	SO					1	1
7_8	2022-08-04	10	SCA						0
7_9	2022-08-04	10	SCA						0
7_10	2022-08-04	10	SCA				1		1
7_11	2022-08-04	10	SCA			4			4
8_1	2022-08-08	10	GCA						0
8_2	2022-08-08	10	GCA			1			1
8_3	2022-08-08	10	GCA						0
8_4	2022-08-08	10	GC			2	3		5
8_5	2022-08-08	10	GC		3	1	3	2	9
8_6	2022-08-08	10	GC				1	1	2
8_7	2022-08-08	10	GC			3	2	1	6
8_8	2022-08-08	10	GC		2	10			12
9_1	2022-08-09	10	GCA						0
9_2	2022-08-09	10	GCA			2			2
9_3	2022-08-09	10	GCA						0
9_4	2022-08-09	10	GCA						0
9_5	2022-08-09	10	GCA						0
9_6	2022-08-09	10	GCA						0
10_1	2022-08-10	10	SC						0
10_2	2022-08-10	10	SC						0
10_3	2022-08-10	10	SC						0
10_4	2022-08-10	10	SC						0
10_5	2022-08-10	10	SC						0
10_6	2022-08-10	10	SC			3	2	1	6
10_7	2022-08-10	10	SC		1	9			10
10_8	2022-08-10	10	SC			1		1	2
11_1	2022-08-11	10	GC			10	1		11
11_2	2022-08-11	4	GC						0
11_3	2022-08-11	10	GC			3		2	5
11_4	2022-08-11	10	SCA			2			2
11_5	2022-08-11	10	SCA			5			5
11_6	2022-08-11	2	SCA						0
11_7	2022-08-11	10	SCA			2			2
12_1	2022-08-15	10	SC			3	1		4
12_2	2022-08-15	10	SC			6	4	1	11
12_3	2022-08-15	10	SC			5		3	8
12_4	2022-08-15	10	SC			1	3	1	5
12_5	2022-08-15	10	SC			4	3	2	9
12_6	2022-08-15	10	SCA			2	2	4	8
13_1	2022-09-08	10	GCA			1			1
13_2	2022-09-08	10	GCA			1			1
14_1	2022-09-09	10	GCA						0
14_2	2022-09-09	10	GCA						0
14_3	2022-09-09	10	GCA						0
14_4	2022-09-09	10	GCA						0
14_5	2022-09-09	10	GCA			1			1
14_6	2022-09-09	10	GCA						0
15_1	2022-09-11	10	GE	Bearded Vulture
15_2	2022-09-11	10	GE	Vulture, ibex
15_3	2022-09-11	10	GU	Deer
15_4	2022-09-11	10	GU	Wild Pigs		1			1
15_5	2022-09-11	10	GO
15_6	2022-09-11	10	GU	Vulture, Ibex
15_7	2022-09-11	10	GU	Sheep
15_8	2022-09-11	10	GE	Badger
15_9	2022-09-11	10	GO
16_1	2022-09-13	10	GU	Wild pigs		1			1
16_2	2022-09-13	10	GU	Deer
16_3	2022-09-13	10	GU	Sheep
16_4	2022-09-13	10	GO
16_5	2022-09-13	10	GO
16_6	2022-09-13	10	GO
16_7	2022-09-13	10	GCA			1			1
° The first number indicates the day of the flagging and the second indicates the session of the day. For example, 2_9 is the 9th session of the second day. °° Following abbreviations are used for the places: Servion Enclosure (SE), Servion Surrounding (SU), Servion Outside (SO), Servion contiguous area (SCA), Servion control area (SC), Garenne Enclosure (GE), Garenne Surrounding (GU), Garenne Ou…
