# Supplementary material for: Ticks and Chlamydia-Related Bacteria in Swiss Zoological Gardens Compared to in Contiguous and Distant Control Areas
Source: Microorganisms. 2023 Sep 30;11(10):2468. doi: 10.3390/microorganisms11102468 (PMC10609390; doi:10.3390/microorganisms11102468)
Supplement: Supplementary file 1 [file microorganisms-11-02468-s001.zip › Table S4.xlsx]

## Sheet: 1
Table S4: Results of Pan-Chlamydiae TaqMan qPCR (pC-qPCR). Please note that initially every tick was tested in duplicate. For the samples 5.1.1 and 11.3.3, we conducted third additional pC-qPCR. Mean DNA quantity is also provided.
Sample°	Ct value°°	Mean DNA quantity (copies/µl)
1.5.1	ND
1.5.1	37.2765	0.208492
1.6.1	37.4126	0.189116
1.6.1	ND
1.7.1	ND
1.7.1	36.162	0.463558
1.7.2	ND
1.7.2	37.5946	0.16598
1.7.3	37.4773	0.232526
1.7.3	36.843	0.232526
2.14.1	37.1696	0.198109
2.14.1	37.5522	0.198109
2.8.1	35.9565	0.334995
2.8.1	37.9053	0.334995
2.9.1	ND
2.9.1	37.5693	0.169017
2.9.2	ND
2.9.2	ND
2.9.3	ND
2.9.3	ND
2.9.4	ND
2.9.4	37.4095	0.189536
2.9.5	ND
2.9.5	36.6924	0.316926
2.9.6	34.4011	2.2148
2.9.6	33.6577	2.2148
2.9.7	ND
2.9.7	ND
2.9.8	36.5836	0.572199
2.9.8	35.3978	0.572199
2.9.9	ND
2.9.9	ND
3.2.1	ND
3.2.1	37.2398	0.214053
3.2.2	36.0177	0.380444
3.2.2	37.0412	0.380444
3.2.3	ND
3.2.3	37.7029	0.153578
3.2.4	ND
3.2.4	ND
3.2.5	34.2296	1.86867
3.2.5	34.2055	1.86867
3.3.1	ND
3.3.1	36.3829	0.395655
3.3.2	34.7398	1.46163
3.3.2	34.401	1.46163
3.3.3	ND
3.3.3	ND
3.3.4	ND
3.3.4	37.5984	0.165529
3.8.1	37.5496	0.547003
3.8.1	35.202	0.547003
3.8.2	35.8943	0.501038
3.8.2	36.2334	0.501038
3.8.3	36.4788	0.517084
3.8.3	35.6591	0.517084
3.8.4	34.0355	2.14262
3.8.4	34.0179	2.14262
3.8.5	38.7393	0.117142
3.8.5	37.6351	0.117142
4.9.1	37.8187	0.141347
4.9.1	ND
4.9.2	ND
4.9.2	ND
4.9.3	35.521	0.733954
4.9.3	ND
4.9.4	ND
4.9.4	37.595	0.165931
4.9.5	36.7794	0.324928
4.9.5	36.5456	0.324928
5.1.1	34.3658	2.63244
5.1.1	33.3088	2.63244
5.1.1	34.8
5.1.1	34.8
5.1.1	34.8
5.1.2	ND
5.1.2	ND
5.2.1	ND
5.2.1	ND
5.2.2	ND
5.2.2	ND
5.2.3	ND
5.2.3	ND
5.2.4	37.3073	0.203945
5.2.4	ND
5.2.10	ND
5.2.10	ND
5.2.11	ND
5.2.11	ND
5.2.12	37.1459	0.0627531
5.2.12	37.3582	0.0627531
5.2.13	37.3842	0.0564906
5.2.13	ND
5.2.5	ND
5.2.5	ND
5.2.6	ND
5.2.6	ND
5.2.7	ND
5.2.7	ND
5.2.8	ND
5.2.8	ND
5.2.9	ND
5.2.9	ND
5.6.1	ND
5.6.1	ND
6.1.1	36.154	0.0964835
6.1.1	37.6166	0.0964835
6.1.2	37.1578	0.105225
6.1.2	36.1769	0.105225
6.1.3	36.1416	0.147137
6.1.3	ND
6.2.1	37.2887	0.0635894
6.2.1	37.1749	0.0635894
6.5.1	36.96	0.0752654
6.5.1	37.0656	0.0752654
6.5.2	ND
6.5.2	ND
6.5.3	36.9805	0.0770997
6.5.3	ND
6.7.1	ND
6.7.1	37.0382	0.0737488
6.7.2	ND
6.7.2	37.3651	0.0573265
6.7.3	ND
6.7.3	ND
7.1.1	ND
7.1.1	ND
7.1.2	ND
7.1.2	ND
7.1.3	37.1225	0.0691079
7.1.3	ND
7.1.4	35.7277	0.165614
7.1.4	36.3141	0.165614
7.1.5	34.9774	0.217146
7.1.5	37.0426	0.217146
7.1.6	35.6888	0.223604
7.1.6	35.5139	0.223604
7.10.1	ND
7.10.1	ND
7.11.1	ND
7.11.1	ND
7.11.2	37.5	0.051668
7.11.2	ND
7.11.3	ND
7.11.3	ND
7.11.4	ND
7.11.4	ND
7.2.1	ND
7.2.1	ND
7.3.1	27.8963	75.2048
7.3.1	28.2161	75.2048
7.4.1	37.1373	0.0683257
7.4.1	ND
7.4.2	35.0537	0.400364
7.4.2	34.6606	0.400364
7.4.3	36.7455	0.131597
7.4.3	35.9481	0.131597
7.4.4	ND
7.4.4	37.092	0.0707494
7.6.1	ND
7.6.1	36.9097	0.0814212
7.6.2	ND
7.6.2	ND
7.6.3	33.7345	0.667132
7.6.3	34.8619	0.667132
7.7.1	33.2812	1.5799
7.7.1	32.8718	1.5799
10.6.1	35.9034	0.132777
10.6.1	36.8359	0.132777
10.6.2	36.948	0.0904287
10.6.2	36.6655	0.0904287
8.2.1	36.3936	0.12275
8.2.1	ND
8.4.1	ND
8.4.1	ND
8.4.2	34.9589	0.325964
8.4.2	35.2518	0.325964
8.4.3	36.5869	0.257008
8.4.3	34.7996	0.257008
8.4.4	ND
8.4.4	ND
8.4.5	37.1171	0.0621483
8.4.5	37.5053	0.0621483
8.5.1	ND
8.5.1	ND
8.5.2	36.3002	0.144612
8.5.2	36.0625	0.144612
8.5.3	ND
8.5.3	37.6304	0.0483465
8.5.4	38.3463	0.106954
8.5.4	35.844	0.106954
8.5.5	38.3648	0.0309528
8.5.5	38.0936	0.0309528
8.5.6	ND
8.5.6	ND
8.5.7	37.2669	0.0635775
8.5.7	ND
8.6.1	ND
8.6.1	37.3418	0.0600889
8.6.2	34.5228	0.35361
8.6.2	35.7146	0.35361
8.7.1	ND
8.7.1	37.5068	0.0530651
8.7.2	ND
8.7.2	ND
8.7.3	36.4724	0.11745
8.7.3	36.4323	0.11745
8.7.4	ND
8.7.4	ND
8.7.5	37.1894	0.0673998
8.7.5	ND
8.7.6	ND
8.7.6	ND
8.8.1	ND
8.8.1	ND
8.8.10	ND
8.8.10	ND
8.8.11	ND
8.8.11	ND
8.8.12	ND
8.8.12	ND
8.8.2	ND
8.8.2	ND
8.8.3	ND
8.8.3	ND
8.8.4	36.0479	0.159275
8.8.4	ND
8.8.5	ND
8.8.5	ND
8.8.6	ND
8.8.6	ND
8.8.7	ND
8.8.7	ND
8.8.8	ND
8.8.8	ND
8.8.9	ND
8.8.9	ND
9.2.1	ND
9.2.1	ND
9.2.2	37.3747	0.0649053
9.2.2	37.1167	0.0649053
10.6.3	22.1933	6471.76
10.6.3	21.7464	6471.76
10.6.4	34.7907	0.431241
10.6.4	35.1387	0.431241
10.6.5	36.458	0.14174
10.6.5	ND
10.6.6	ND
10.6.6	ND
10.7.1	ND
10.7.1	39.1038	0.0200285
10.7.10	36.0086	0.265238
10.7.10	35.3036	0.265238
10.7.2	36.1157	0.140985
10.7.2	36.9377	0.140985
10.7.3	36.9091	0.143839
10.7.3	36.0894	0.143839
10.7.4	37.5062	0.0521139
10.7.4	38.2046	0.0521139
10.7.5	38.8949	0.0395802
10.7.5	37.7187	0.0395802
10.7.6	35.9149	0.142133
10.7.6	37.3649	0.142133
10.7.7	ND
10.7.7	ND
10.7.8	37.2205	0.0863982
10.7.8	37.0401	0.0863982
10.7.9	37.8785	0.0495683
10.7.9	ND
10.8.1	ND
10.8.1	ND
10.8.2	ND
10.8.2	ND
11.1.1	ND
11.1.1	ND
11.1.10	37.2374	0.0796427
11.1.10	ND
11.1.11	ND
11.1.11	36.1877	0.173104
11.1.2	ND
11.1.2	ND
11.1.3	ND
11.1.3	ND
11.1.4	ND
11.1.4	37.6441	0.0589506
11.1.5	36.3843	0.10372
11.1.5	37.6717	0.10372
11.1.6	ND
11.1.6	ND
11.1.7	37.5961	0.136979
11.1.7	35.9081	0.136979
11.1.8	ND
11.1.8	37.2276	0.0802182
11.1.9	ND
11.1.9	ND
11.3.1	ND
11.3.1	37.1431	0.0853956
11.3.2	ND
11.3.2	ND
11.3.3	34.9349	0.437238
11.3.3	ND
11.3.3	36
11.3.3	36.8
11.3.3	ND
11.3.4	35.0427	0.698339
11.3.4	33.8258	0.698339
11.3.5	38.2572	0.0410574
11.3.5	38.0197	0.0410574
11.4.1	ND
11.4.1	ND
11.4.2	39.2911	0.0927687
11.4.2	36.2273	0.0927687
11.5.1	ND
11.5.1	ND
11.5.2	38.0015	0.0616462
11.5.2	37.2649	0.0616462
11.5.3	37.4148	0.0698498
11.5.3	ND
11.5.4	ND
11.5.4	37.5344	0.0639359
11.5.5	ND
11.5.5	ND
11.7.1	ND
11.7.1	ND
11.7.2	ND
11.7.2	ND
12.1.1	ND
12.1.1	ND
12.1.2	ND
12.1.2	ND
12.1.3	ND
12.1.3	ND
12.1.4	36.4085	0.184275
12.1.4	37.7036	0.184275
12.2.1	34.9675	0.671243
12.2.1	35.1363	0.671243
12.2.10	37.4903	0.12374
12.2.10	ND
12.2.11	ND
12.2.11	ND
12.2.2	ND
12.2.2	ND
12.2.3	37.46	0.195023
12.2.3	36.3982	0.195023
12.2.4	ND
12.2.4	ND
12.2.5	ND
12.2.5	ND
12.2.6	37.3149	0.109243
12.2.6	38.1425	0.109243
12.2.7	ND
12.2.7	37.2576	0.145391
12.2.8	36.2444	0.293324
12.2.8	ND
12.2.9	37.3209	0.134638
12.2.9	37.4177	0.134638
12.3.1	ND
12.3.1	ND
12.3.2	ND
12.3.2	ND
12.3.3	37.4655	0.110846
12.3.3	37.8597	0.110846
12.3.4	ND
12.3.4	ND
12.3.5	38.0167	0.232851
12.3.5	35.8716	0.232851
12.3.6	35.8707	0.380002
12.3.6	ND
12.3.7	37.4969	0.123174
12.3.7	ND
12.3.8	ND
12.3.8	ND
12.4.1	37.5493	0.0845502
12.4.1	38.7893	0.0845502
12.4.2	ND
12.4.2	ND
12.4.3	ND
12.4.3	36.4457	0.255146
12.4.4	38.0444	0.0842984
12.4.4	ND
12.4.5	ND
12.4.5	ND
12.5.1	37.7443	0.125364
12.5.1	37.2422	0.125364
12.5.2	ND
12.5.2	37.2059	0.150691
12.5.3	ND
12.5.3	ND
12.5.4	37.0341	0.269928
12.5.4	35.9087	0.269928
12.5.5	33.6969	2.01526
12.5.5	33.2608	2.01526
12.5.6	37.0047	0.128994
12.5.6	38.0365	0.128994
12.5.7	38.0056	0.0865909
12.5.7	ND
12.5.8	ND
12.5.8	38.9653	0.0445399
12.5.9	35.1312	0.670486
12.5.9	34.9751	0.670486
12.6.1	33.8415	1.02696
12.6.1	35.463	1.02696
12.6.2	35.3139	0.4374
12.6.2	36.1373	0.4374
12.6.3	35.9549	0.630707
12.6.3	34.6214	0.630707
12.6.4	ND
12.6.4	ND
12.6.5	38.0169	0.258543
12.6.5	37.0837	0.258543
12.6.6	38.9226	0.123067
12.6.6	38.2622	0.123067
12.6.7	37.9439	0.17766
12.6.7	38.104	0.17766
12.6.8	36.777	0.41848
12.6.8	ND
13.1.1	ND
13.1.1	ND
13.2.1	34.0994	1.89207
13.2.1	35.3196	1.89207
14.5.1	35.0086	1.15085
14.5.1	35.6837	1.15085
15.4.1	38.3199	0.109181
15.4.1	39.3008	0.109181
16.1.1	36.1995	0.796901
16.1.1	35.5541	0.796901
16.7.1	ND
16.7.1	ND
8.5.8	ND
8.5.8	ND
8.5.9	ND
8.5.9	ND
° The first number indicates the day of the flagging, the second indicates the session of the day, the third the number of the ticks. For example, the tick called 2.9.6 was collected during the second day of flagging, it was the 9th session of that day, and was the 6th tick of that session. °° ND = Not determined ct value. Ticks with at least 1 monoplicat with a ct value < 35 were considered posi…
